# Supplementary material for: Effects of Molecular Iodine/Chemotherapy in the Immune Component of Breast Cancer Tumoral Microenvironment
Source: Preprints.org preprint supplement (doi:10.20944/preprints202109.0170.v1), 2021-09-09
Supplement: Supplementary file 2 [file supplementary]

Table S1: Primers for RT-PCR genes expression

| **GENES** | **REFERENCE** | **OLIGOS (FWD/RVS)** | **SIZE (BP)** |
| --- | --- | --- | --- |
| **IL-12RB** | NM_001290023.2 | CCCAGCAGCCCATGGA | 92 |
| TCCTGGGCCACATTCATCTC |
| **T-BET** | NM_013351.2 | GCTGCCCCACTTTGAACATCAG | 164 |
| GGAGGCTTGGGGGAGAGAGAAT |
| **IFNγ** | NM_000619.3 | GGCAAGGCTATGTGATTACAAGG | 96 |
| CATCAAGTGAAATAAACACACAACCC |
| **TGFβ** | NM_00660.7 | ATCGGTGCTGACGCCTGGCCC | 197 |
| TGCTGTTGTACAGGGCGAGCA |
| **GATA-3** | NM_002051.3 | ACGTCTCACTCTCGAGGCAGCATG | 564 |
| GAAGTCCTCCAGCGCGTCATGCAC |

Table S2: Primers for Methylated promoter regions (After Bisulfite conversion) and for housekeeping gene MLH-1 also for after bisulfite conversion.

| **GENES** | **REFERENCE** | **OLIGOS (FWD/RVS)** | **SIZE (BP)** |
| --- | --- | --- | --- |
| **IFNγ** | Methprimer | TTTTGATTAATATAGTGAAATTTCGT | 194 |
| TCACCCAAACTAAAATACAATAACG |
| **TGFβ** | GTTTTTTTGTGTTTTATTTTTCGG | 142 |
| AAACAAAATACTACCTCCTAACGAC |
| **MLH-1** | GenBank Accession  #: U83845 | GGAGTGAAGGAGGTTACGGGTAATG | 182 |
| AAAAACGATAAAACCCTATACCTAATCTATC |

Table S3: Primers for Unmethylated promoter regions (After Bisulfite conversion)

| **GENES** | **REFERENCE** | **OLIGOS (FWD/RVS)** | **SIZE (BP)** |
| --- | --- | --- | --- |
| **IFNγ** | Methprimer | TTGATTAATATAGTGAAATTTTGT | 190 |
| ACCCAAACTAAAATACAATAACACA |
| **TGFβ** | TTTTTTTGTGTTTTATTTTTTGG | 141 |
| AAACAAAATACTACCTCCTAACAAC |
